# Supplementary material
Source: publisher site journal article supplement (https://www.kjim.org/upload/media/kjim-2025-171-Supplementary-Table-5.pdf)
Supplement: Supplementary file 1 [file kjim-2025-171-Supplementary-Table-5.pdf]

**Supplementary Table 5. Stratification analysis of the incident risk of any hepatobiliary events following zoster vaccination in the propensity score-matched cohort**

| Any hepatobiliary events             | Events, n (%)  | Incidence rate <sup>b)</sup> | aHR (95% CI)                      |                                   |
|--------------------------------------|----------------|------------------------------|-----------------------------------|-----------------------------------|
|                                      |                |                              | Model 1 <sup>c)</sup>             | Model 2 <sup>d)</sup>             |
| Sex                                  |                |                              |                                   |                                   |
| Male                                 |                |                              |                                   |                                   |
| Unvaccinated                         | 48,498 (15.26) | 13.36                        | 1.0 (reference)                   | 1.0 (reference)                   |
| Vaccinated                           | 38,516 (11.97) | 11.56                        | 0.83 (0.82 to 0.84) <sup>e)</sup> | 0.83 (0.81 to 0.84) <sup>e)</sup> |
| Female                               |                |                              |                                   |                                   |
| Unvaccinated                         | 59,509 (14.40) | 16.39                        | 1.0 (reference)                   | 1.0 (reference)                   |
| Vaccinated                           | 51,248 (12.52) | 15.38                        | 0.89 (0.88 to 0.90) <sup>e)</sup> | 0.88 (0.87 to 0.89) <sup>e)</sup> |
| Age (yr)                             |                |                              |                                   |                                   |
| < 60                                 |                |                              |                                   |                                   |
| Unvaccinated                         | 39,864 (20.49) | 10.98                        | 1.0 (reference)                   | 1.0 (reference)                   |
| Vaccinated                           | 31,680 (16.11) | 9.50                         | 0.80 (0.79 to 0.81) <sup>e)</sup> | 0.79 (0.78 to 0.80) <sup>e)</sup> |
| ≥ 60                                 |                |                              |                                   |                                   |
| Unvaccinated                         | 68,143 (12.70) | 18.77                        | 1.0 (reference)                   | 1.0 (reference)                   |
| Vaccinated                           | 58,084 (10.87) | 17.43                        | 0.90 (0.89 to 0.91) <sup>e)</sup> | 0.90 (0.89 to 0.91) <sup>e)</sup> |
| Region of residence                  |                |                              |                                   |                                   |
| Urban                                |                |                              |                                   |                                   |
| Unvaccinated                         | 51,703 (15.23) | 14.24                        | 1.0 (reference)                   | 1.0 (reference)                   |
| Vaccinated                           | 43,767 (12.90) | 13.13                        | 0.87 (0.86 to 0.89) <sup>e)</sup> | 0.87 (0.86 to 0.88) <sup>e)</sup> |
| Rural                                |                |                              |                                   |                                   |
| Unvaccinated                         | 56,304 (14.38) | 15.51                        | 1.0 (reference)                   | 1.0 (reference)                   |
| Vaccinated                           | 45,997 (11.74) | 13.80                        | 0.85 (0.84 to 0.87) <sup>e)</sup> | 0.85 (0.84 to 0.86) <sup>e)</sup> |
| Household income                     |                |                              |                                   |                                   |
| Low (0th–39th percentile)            |                |                              |                                   |                                   |
| Unvaccinated                         | 31,985 (15.14) | 8.81                         | 1.0 (reference)                   | 1.0 (reference)                   |
| Vaccinated                           | 25,622 (12.19) | 7.69                         | 0.84 (0.83 to 0.85) <sup>e)</sup> | 0.83 (0.82 to 0.85) <sup>e)</sup> |
| Middle (40th–79th percentile)        |                |                              |                                   |                                   |
| Unvaccinated                         | 38,874 (14.70) | 10.71                        | 1.0 (reference)                   | 1.0 (reference)                   |
| Vaccinated                           | 31,858 (12.17) | 9.56                         | 0.87 (0.86 to 0.88) <sup>e)</sup> | 0.86 (0.85 to 0.88) <sup>e)</sup> |
| High (80th–100th percentile)         |                |                              |                                   |                                   |
| Unvaccinated                         | 37,148 (14.55) | 10.23                        | 1.0 (reference)                   | 1.0 (reference)                   |
| Vaccinated                           | 32,284 (12.46) | 9.69                         | 0.88 (0.87 to 0.89) <sup>e)</sup> | 0.87 (0.86 to 0.89) <sup>e)</sup> |
| Body mass index (kg/m <sup>2</sup> ) |                |                              |                                   |                                   |
| < 23.0                               |                |                              |                                   |                                   |
| Unvaccinated                         | 26,134 (13.66) | 7.20                         | 1.0 (reference)                   | 1.0 (reference)                   |
| Vaccinated                           | 22,291 (11.66) | 6.69                         | 0.89 (0.87 to 0.90) <sup>e)</sup> | 0.88 (0.86 to 0.89) <sup>e)</sup> |
| 23.0–24.9                            |                |                              |                                   |                                   |
| Unvaccinated                         | 28,991 (14.47) | 7.99                         | 1.0 (reference)                   | 1.0 (reference)                   |
| Vaccinated                           | 23,774 (11.95) | 7.13                         | 0.86 (0.85 to 0.88) <sup>e)</sup> | 0.85 (0.84 to 0.87) <sup>e)</sup> |
| ≥ 25.0                               |                |                              |                                   |                                   |
| Unvaccinated                         | 52,882 (15.58) | 14.57                        | 1.0 (reference)                   | 1.0 (reference)                   |
| Vaccinated                           | 43,699 (12.82) | 13.11                        | 0.86 (0.84 to 0.87) <sup>e)</sup> | 0.85 (0.84 to 0.86) <sup>e)</sup> |

Supplementary Table 5. Continued

| Any hepatobiliary events                   | Events, n (%)   | Incidence rate <sup>b)</sup> | aHR (95% CI)                      |                                   |
|--------------------------------------------|-----------------|------------------------------|-----------------------------------|-----------------------------------|
|                                            |                 |                              | Model 1 <sup>c)</sup>             | Model 2 <sup>d)</sup>             |
| Smoking status <sup>a)</sup>               |                 |                              |                                   |                                   |
| Non-smoker                                 |                 |                              |                                   |                                   |
| Unvaccinated                               | 73,127 (14.47)  | 20.14                        | 1.0 (reference)                   | 1.0 (reference)                   |
| Vaccinated                                 | 61,535 (12.29)  | 18.46                        | 0.88 (0.87 to 0.89) <sup>e)</sup> | 0.87 (0.86 to 0.88) <sup>e)</sup> |
| Smoker                                     |                 |                              |                                   |                                   |
| Unvaccinated                               | 34,880 (15.45)  | 9.61                         | 1.0 (reference)                   | 1.0 (reference)                   |
| Vaccinated                                 | 28,229 (12.26)  | 8.47                         | 0.84 (0.82 to 0.85) <sup>e)</sup> | 0.83 (0.82 to 0.84) <sup>e)</sup> |
| Alcohol consumption (day per week)         |                 |                              |                                   |                                   |
| < 1                                        |                 |                              |                                   |                                   |
| Unvaccinated                               | 49,116 (12.10)  | 13.53                        | 1.0 (reference)                   | 1.0 (reference)                   |
| Vaccinated                                 | 37,859 (9.38)   | 11.36                        | 0.80 (0.79 to 0.82) <sup>e)</sup> | 0.80 (0.79 to 0.81) <sup>e)</sup> |
| 1–4                                        |                 |                              |                                   |                                   |
| Unvaccinated                               | 56,578 (18.06)  | 15.59                        | 1.0 (reference)                   | 1.0 (reference)                   |
| Vaccinated                                 | 49,939 (15.90)  | 14.98                        | 0.91 (0.90 to 0.92) <sup>e)</sup> | 0.90 (0.89 to 0.91) <sup>e)</sup> |
| ≥ 5                                        |                 |                              |                                   |                                   |
| Unvaccinated                               | 2,313 (19.16)   | 0.64                         | 1.0 (reference)                   | 1.0 (reference)                   |
| Vaccinated                                 | 1,966 (14.88)   | 0.59                         | 0.82 (0.77 to 0.87) <sup>e)</sup> | 0.81 (0.76 to 0.86) <sup>e)</sup> |
| Physical activity                          |                 |                              |                                   |                                   |
| Insufficient physical activity             |                 |                              |                                   |                                   |
| Unvaccinated                               | 82,946 (14.79)  | 22.85                        | 1.0 (reference)                   | 1.0 (reference)                   |
| Vaccinated                                 | 68,386 (12.31)  | 20.52                        | 0.87 (0.86 to 0.87) <sup>e)</sup> | 0.86 (0.85 to 0.87) <sup>e)</sup> |
| Sufficient physical activity               |                 |                              |                                   |                                   |
| Unvaccinated                               | 25,061 (14.72)  | 6.90                         | 1.0 (reference)                   | 1.0 (reference)                   |
| Vaccinated                                 | 21,378 (12.19)  | 6.41                         | 0.86 (0.85 to 0.88) <sup>e)</sup> | 0.86 (0.84 to 0.87) <sup>e)</sup> |
| Medication use for coronary artery disease |                 |                              |                                   |                                   |
| No                                         |                 |                              |                                   |                                   |
| Unvaccinated                               | 104,015 (14.76) | 28.65                        | 1.0 (reference)                   | 1.0 (reference)                   |
| Vaccinated                                 | 86,392 (12.25)  | 25.92                        | 0.86 (0.86 to 0.87) <sup>e)</sup> | 0.86 (0.85 to 0.87) <sup>e)</sup> |
| Yes                                        |                 |                              |                                   |                                   |
| Unvaccinated                               | 3,992 (15.23)   | 1.10                         | 1.0 (reference)                   | 1.0 (reference)                   |
| Vaccinated                                 | 3,372 (13.04)   | 1.01                         | 0.88 (0.85 to 0.93) <sup>e)</sup> | 0.88 (0.84 to 0.92) <sup>e)</sup> |
| Medication use for hypertension            |                 |                              |                                   |                                   |
| No                                         |                 |                              |                                   |                                   |
| Unvaccinated                               | 71,219 (14.64)  | 19.62                        | 1.0 (reference)                   | 1.0 (reference)                   |
| Vaccinated                                 | 57,906 (12.11)  | 17.37                        | 0.87 (0.86 to 0.88) <sup>e)</sup> | 0.86 (0.85 to 0.87) <sup>e)</sup> |
| Yes                                        |                 |                              |                                   |                                   |
| Unvaccinated                               | 36,788 (15.04)  | 10.13                        | 1.0 (reference)                   | 1.0 (reference)                   |
| Vaccinated                                 | 31,858 (12.59)  | 9.56                         | 0.85 (0.84 to 0.86) <sup>e)</sup> | 0.85 (0.84 to 0.86) <sup>e)</sup> |

**Supplementary Table 5. Continued**

| Any hepatobiliary events          | Events, n (%)  | Incidence rate <sup>b)</sup> | aHR (95% CI)                      |                                   |
|-----------------------------------|----------------|------------------------------|-----------------------------------|-----------------------------------|
|                                   |                |                              | Model 1 <sup>c)</sup>             | Model 2 <sup>d)</sup>             |
| Medication use for diabetes       |                |                              |                                   |                                   |
| No                                |                |                              |                                   |                                   |
| Unvaccinated                      | 93,276 (14.70) | 25.70                        | 1.0 (reference)                   | 1.0 (reference)                   |
| Vaccinated                        | 76,710 (12.21) | 23.01                        | 0.87 (0.86 to 0.88) <sup>e)</sup> | 0.86 (0.85 to 0.87) <sup>e)</sup> |
| Yes                               |                |                              |                                   |                                   |
| Unvaccinated                      | 14,731 (15.25) | 4.06                         | 1.0 (reference)                   | 1.0 (reference)                   |
| Vaccinated                        | 13,054 (12.68) | 3.92                         | 0.84 (0.82 to 0.86) <sup>e)</sup> | 0.84 (0.82 to 0.86) <sup>e)</sup> |
| Medication use for hyperlipidemia |                |                              |                                   |                                   |
| No                                |                |                              |                                   |                                   |
| Unvaccinated                      | 91,665 (14.65) | 25.25                        | 1.0 (reference)                   | 1.0 (reference)                   |
| Vaccinated                        | 75,375 (12.17) | 22.61                        | 0.87 (0.86 to 0.88) <sup>e)</sup> | 0.86 (0.85 to 0.87) <sup>e)</sup> |
| Yes                               |                |                              |                                   |                                   |
| Unvaccinated                      | 16,342 (15.50) | 4.50                         | 1.0 (reference)                   | 1.0 (reference)                   |
| Vaccinated                        | 14,389 (12.87) | 4.32                         | 0.83 (0.81 to 0.85) <sup>e)</sup> | 0.83 (0.81 to 0.85) <sup>e)</sup> |

aHR, adjusted hazard ratio; CI, confidence interval.

<sup>a)</sup>Non-smoker indicates individuals who do not currently smoke.<sup>b)</sup>Incidence rate expressed as per 1,000 person-years.<sup>c)</sup>Models 1: adjusted for age (50–54, 55–59, 60–64, and ≥ 65 years) and sex.<sup>d)</sup>Model 2: adjusted for age (50–54, 55–59, 60–64, and ≥ 65 years); sex; household income (low income, middle income, and high income); region of residence (urban and rural); Charlson comorbidity index (0, 1, and ≥ 2); obesity (underweight [ $< 18.5 \text{ kg/m}^2$ ], normal [ $18.5\text{--}22.9 \text{ kg/m}^2$ ], overweight [ $23.0\text{--}24.9 \text{ kg/m}^2$ ], and obese [ $\geq 25.0 \text{ kg/m}^2$ ]); blood pressure (systolic blood pressure  $< 140 \text{ mmHg}$  and diastolic blood pressure  $< 90 \text{ mmHg}$  and systolic blood pressure  $\geq 140 \text{ mmHg}$  or diastolic blood pressure  $\geq 90 \text{ mmHg}$ ); fasting blood glucose ( $< 100$  and  $\geq 100 \text{ mg/dL}$ ); glomerular filtration rate ( $< 60$ ,  $60\text{--}89$ , and  $\geq 90 \text{ mL/min/1.73 m}^2$ ); smoking status (non-, ex-, and current smoker); alcohol consumption (drinks;  $< 1$ ,  $1\text{--}2$ ,  $3\text{--}4$ , and  $\geq 5$  days per week); aerobic physical activity (sufficient and insufficient); and history of medication use for coronary artery disease, diabetes mellitus, dyslipidemia, and hypertension.<sup>e)</sup>Significant differences ( $p < 0.05$ ).
